# Supplementary material for: Reflections on the Forms and Arrangements of Surface Images in the Art of Barniz de Pasto, from the 16th to the 19th Century
Source: MDPI journal article supplement (doi:10.3390/heritage6070286), 2023-07-17
Supplement: s1 [file s1]

## Article

# Reflexiones sobre las imágenes, su forma y disposición en las superficies, en el arte del barniz de Pasto, siglos XVI al XIX

María del Pilar López Pérez

Instituto Investigaciones Estéticas / Facultad de Artes / Universidad Nacional de Colombia;  
111321 Bogotá, Colombia; mdlopezperezd@unal.edu.co

**Resumen:** Flores, ramas, aves, animales, diversidad de combinaciones geométricas y variadas escenas crean con gran esmero, un mundo primoroso y exquisitamente ornamentado. Entre simetrías, proporciones, sentido cromático y figuras repetidas se configuran y disponen en el arte del barniz de Pasto superficies artísticas. Mi reflexión está encaminada a conocer con mayor profundidad las maravillosas realizaciones que los pintores de barniz de Pasto elaboraron en las ciudades de San Juan de Pasto y San Francisco de Quito, y sus entornos culturales, explorando ese mundo visual que forma parte de un grupo de objetos realizados con superposición de capas de membrana para definir las figuras, con presencia de lámina de plata, en los que por lo general se evidencia un importante relieve. Entender cómo se dispusieron las figuras en la superficie de los objetos, cómo se organizan y cómo es el sistema de composición y otros posibles recursos artísticos para controlar las superficies, me lleva a considerar que los artesanos tenían una formación similar a la que se impartía en el campo del pintor español, en varias de sus modalidades. Para ello se tendrá como referencia algunos de los ejemplos más reconocidos en este arte neogranadino. Se analizarán tres ejemplos de distintas épocas y muy diferentes en su configuración: un arca, un escritorio y una bandeja. Todos recubiertos con barniz de Pasto y en todos se plantearon diferentes retos compositivos para el pintor de barniz. Este razonamiento se centra en torno a la sintaxis de la imagen, no sobre la técnica físico mecánica en el uso de los materiales y los soportes, sino las técnicas utilizadas para la estructura organizativa y sus procesos, y así comprender que había unas maneras de organizar los elementos en un espacio específico y que éstas venían de prácticas profesionales asociadas principalmente a la pintura.

**Palabras clave:** arte de barniz de Pasto; pintor de barniz de Pasto; ornamento; composición; estructura organizativa; *mopa-mopa*

## 1. El barniz de Pasto, un arte vinculado al campo profesional de la pintura

Reconocido como Patrimonio Inmaterial de la Humanidad el Trabajo con el barniz de Pasto recoge una tradición de más de cinco siglos en la que se reconoce un campo amplio, diverso y complejo, desde la técnica y sus variaciones generadas por el intercambio de saberes y materiales, la representación formal que en diferentes momentos de la historia propiciaron cambios adaptándose y transformándose, hasta el uso y contenido de las imágenes en las que se ven reflejados valores culturales.

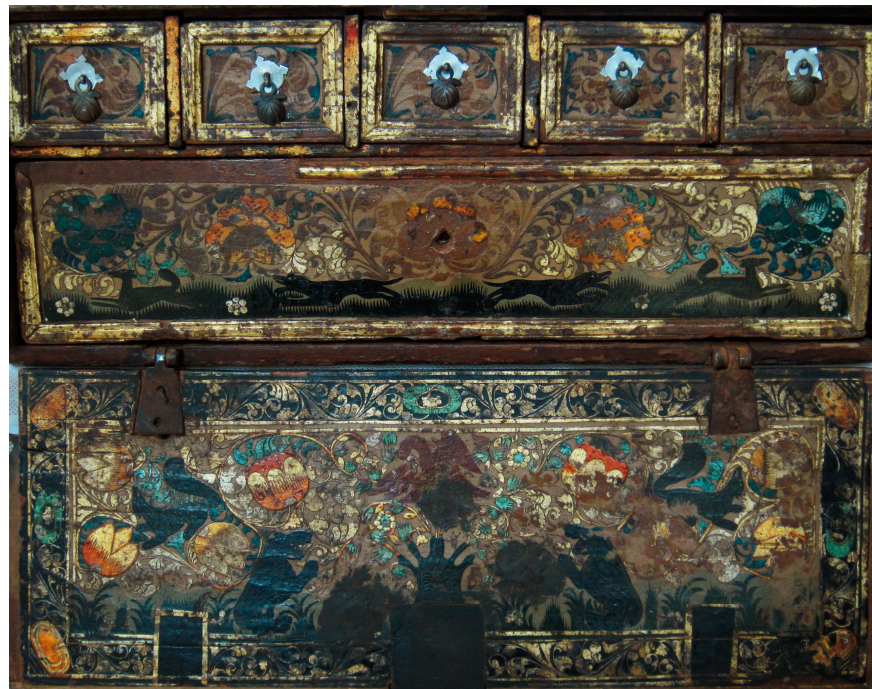

**Imagen 1 – Interior de un escritorio con el tema del árbol de la vida y el pelicano, siglos XVI-XVII, Museo Nacional del Ecuador, Quito, código 0082-020-78. Fotografía María del Pilar López Pérez.**

Los valores formales, estéticos y técnicos del trabajo con el barniz de Pasto representan un arte destacado en la producción de objetos de uso en el que además confluyeron diversos oficios como la carpintería, la platería y la herrería cuya capacidad creativa dio origen a obras singulares con nuevos valores artísticos en la tradición andina y en particular en Nariño, al sur de Colombia, y en el norte del Ecuador.

Siendo, el trabajo con el barniz de Pasto, un arte con una tradición anterior a la llegada de los españoles a América y teniendo un reconocimiento del potencial del *mopa-mopa* por las poblaciones de un extenso territorio, para la sociedad actual y para los estudiosos de este arte aún vivo y en actual ejercicio, estas obras siempre nos sorprenden y nos revelan algo desconocido o no estudiado, lo que hace que estos objetos tengan nuevo potencial de conocimientos.

Como es sabido, la resina obtenida de la planta *Elaeagia Pastoensis* tradicionalmente denominada *mopa-mopa*, se conoció en un amplio territorio de la región andina y fue utilizada para recubrir diversos objetos de madera con un trabajo técnico y artístico que implicaba un dominio especializado. Este arte fue realizado principalmente en los talleres del entorno de las ciudades de Pasto y Quito, y fue requerido tanto por la iglesia, el estado y la sociedad general, trabajándose temáticas como escenas de la vida cotidiana, morales y religiosas, algunos símbolos de estado y una gran variedad de ornamentos de flores y geometrías. En su gran acervo de imágenes es sorprendente la presencia de animales locales o traídos de otros continentes, el gusto por fantásticas aves y flores y un extenso repertorio de figuras geométricas y orgánicas (ver Imagen 1). Estas imágenes fueron elaboradas con técnicas híbridas [1] entre la tradición indígena y la española y han estado en permanente cambio y adaptación con otras culturas de otras regiones debido a las múltiples formas de intercambio cultural [2].

Desde el siglo XVI, el arte del barniz de Pasto se reconoció por analogía como un trabajo semejante a los realizados en el campo profesional del pintor teniendo en cuenta varias de sus modalidades, que son reconocidas por Antonio Palomino en su tratado *El museo pictórico y escala óptica* [3], enunciadas ya por la historiadora Sonia Ocaña [4]. Palomino menciona al pintor de pared al fresco y al temple, de tabla o lienzo al óleo, pintor de bordado y de tejido, aguazo de porcelana, pintor de embutido, de cerífica, férrea y vítrea.

Y a esta diversidad de especialidades se podría agregar el pintor de escultura. Por esto se entiende que los que enlucían y barnizaban con “cosa que se pega” los diversos objetos de uso, se reconocieron como pintores de barniz llamados *llimpec*, “pintores que pintan en paredes y en quero y en mate” [5] según lo dicho por Felipe Guamán Poma de Ayala en su libro *Nueva Crónica y Buen Gobierno*.

Además, desde los siglos XVI al XVIII en la documentación de diferentes archivos, se identifica al profesional que trabaja con *mopa-mopa* como “pintor de barniz de Pasto” y las obras que produjeron “pinturas de barniz de Pasto”. Al respecto, historiadora Laura Vargas Murcia transcribe un documento de 1738, un “juicio ejecutivo por pinturas de barniz de Pasto” que reposa en el Archivo Central del Cauca en Popayán. En este documento no sólo se reconoce este arte como “Pinturas de barniz de Pasto”, sino que también se reconocen como pintores de barniz de Pasto a los señores Casimiro Benavides, Juan de Benavides y Felipe Pérez de Zúñiga [6]. Posteriormente, en el siglo XIX, en 1849 se identifica a Crisanto Granja como maestro mayor de los “pintores al óleo y barniz” [7].

Como sucedió con todo tipo de trabajo de manufactura en los Nuevos Reinos, el modelo de enseñanza artística establecido en los talleres de barniz de Pasto provino de las formas tradicionales de trabajo que regía en los talleres españoles, específicamente en talleres relacionados con el arte de la pintura. Este modelo se impuso en América donde hay claras evidencias que tanto indígenas como españoles compartieron actividades en diversos oficios. En este sentido, también se encuentra documentado el ingreso de niños indígenas para aprender el trabajo del pintor a través de contratos de aprendizaje<sup>1</sup>. Esto demuestra el mestizaje que al parecer se mantuvo durante los siglos XVI y XVII, pues ya en el siglo XVIII se presentan algunos cambios, y en el caso particular del barniz de Pasto aparentemente los talleres fueron mayoritariamente de indígenas y mestizos<sup>2</sup>.

El proceso de trabajo y aprendizaje del pintor se legalizaba, como en España, mediante un contrato o carta de aprendizaje, registrado en una notaría o a través de un acuerdo verbal<sup>3</sup>. Aunque no tenemos registrados mayores datos relacionados con el barniz de Pasto, por referencia a otras fuentes similares, como el caso de la formación de los pintores y plateros que implicaba el ejercicio del buen dibujo, se puede deducir alguna información.

Uno de los requisitos básicos impartidos por el maestro mayor de pintura en España fue conocer y familiarizarse con los materiales, prepararlos y alistarlos, empezar a reconocer algún proceso técnico y aprender a dibujar para dominar la “simetría y compartimentación de las partes”<sup>4</sup> [8] además de saber copiar y dar colorido. En una siguiente etapa el aprendiz debía también aprender a leer, escribir y contar<sup>5</sup>.

Se puede deducir, que no fue ajeno en este proceso que las formas y la organización de las figuras en el trabajo del barniz de Pasto pudieran llegar de muchas fuentes afines a la profesión del pintor, por ejemplo, a través del comercio de estampas, dibujos y objetos de uso, siendo ejemplos de cómo solucionar problemas de organización de superficie y construcción de patrones visuales. El pintor se preocupó por aprender a dibujar [9] y con ello representar también elementos formales, considerados de menor importancia como elementos ornamentales que están referenciados por algunos tratadistas de la época, como Vicente Carducho, Jusepe Martínez, Francisco Pacheco y entre otros Sebastián Serlio [10].

Lo anteriormente dicho sería el estado ideal de formación del futuro artesano pintor de barniz de Pasto, lo que seguramente no se dio del todo. Pero el sólo hecho de recibir la educación más básica de la formación del pintor, tanto para criollos como indígenas y mestizos, les permitió que desarrollaran habilidades para estructurar con gran sensibilidad artística las superficies que iban a trabajar.

En el campo profesional del pintor en España, sea cual fuere su especialidad: pintor de pared, pintor de tabla y lienzo o pintor de escultura, estos se formaban aprendiendo a dibujar y a dominar, en alguna medida, las matemáticas y la geometría<sup>6</sup>. Es conocida la importancia que tenían los dibujos de trazas y de exámenes, y las estampas, inclusive las cartillas para aprender a dibujar [11]. Se seleccionaban cuidadosamente las formas y temas más apropiados como recursos didácticos y modelos pedagógicos en la práctica de los

talleres “siguiendo una estrategia que va de lo sencillo a lo complejo y de la línea de contorno al volumen” [12]. Algo interesante que destaca José Manuel Mantilla<sup>7</sup> es que de manera paralela había que conocer la geometría de las figuras y los volúmenes, descomponiendo las formas en su estructura básica, siendo el conocimiento de la geometría algo fundamental en la práctica del dibujo. Estos ejercicios obligaban a tener en cuenta cómo asumía el pintor el espacio o la superficie, la calidad gráfica del dibujo, la construcción geométrica de una figura y los diferentes trazos para definir partes y direcciones. De acuerdo a la finalidad de la obra se escogía de manera adecuada la imagen de referencia, y a partir de las fuentes gráficas se facilitaban aspectos relativos a la composición, la expresión y el movimiento [13].

A falta de amplias fuentes documentales que permitieran conocer con algún detalle cómo fue la práctica artística y el proceso de formación en los talleres, que sin duda fue una formación tradicional de maestro a aprendiz, se considera importante tener en cuenta lo sugerido por los tratadistas de pintura de la época cuyos tratados plantearon las recomendaciones para llegar a ser un buen pintor. En estos libros no sólo se recoge el conocimiento y los aportes personales del autor, también una manera de ejercer el oficio, que viene de larga tradición y está instalada en la memoria y en los procedimientos prácticos de los artesanos. En los tratados se realizan significativos aportes por parte del autor, que siempre es un maestro mayor del oficio, brindando, tanto datos técnicos como especulativos que servían de orientación en el ejercicio de la profesión y que recogieron del conocimiento del oficio que existía en España antes de que se escribiera el tratado, y en la gran mayoría de los casos éste es el saber que se lleva y se aplica tempranamente en los nuevos territorios<sup>8</sup> [14].

El pintor Vicente Carducho (1576-1638) en su libro *Diálogos de la pintura* escrito en 1633, entre razonamientos y preguntas resalta cómo se perciben aquellas obras de pintura sin aplicar los recursos del buen dibujo, diciendo que eran obras “de malas proporciones, sin gracia, ni entendimiento” [15], aunque aclaraba que con el uso del color, las obras podrían dar una impresión favorable.

No es de extrañar que otros destacados pintores incluyeran en sus tratados una reflexión importante sobre el dibujo, como el pintor aragonés Jusepe Martínez (1600-1682), quien en su libro, escrito alrededor de 1675 *Discursos practicables del nobilísimo arte de la pintura*, entre los primeros temas que aborda es el del dibujo y las “maneras de obrarlo con buena imitación”. Plantea que es una actividad propia del oficio, muy necesaria, que se llega a dominar a través de la práctica, iniciando por la copia de figuras sueltas tomadas de las estampas, hasta la copia de imágenes de mayor dificultad como las historias completas. Posteriormente el pintor pasaría a copiar del natural siguiendo diferentes pasos. Pero para crear obras de invención y no de imitación, el pintor debía practicar con ejercicios más complejos como la simetría, la perspectiva, el espacio y el color. Según él, para avanzar se debía estudiar o “cursarlo mucho, y de aquí pasar a considerar la correspondencia que hay entre las partes, y de ellas al todo. Esta correspondencia es la simetría” [16] nombrando como ejemplo a Vitruvio, Durero y otros admirables artistas que según él han sobrepasado el compás y la regla, y que reseña en el escrito.

De otra parte, los pintores en España no sólo se dedicaban a dibujar y pintar importantes temas religiosos o históricos, también desarrollaron dibujos en el campo del ornamento como lo señala Francisco Pacheco (1564-1644) en su tratado *El arte de la pintura* publicado en 1649. En sus dos primeros libros o capítulos recoge, como sus contemporáneos, el saber profesional de su tiempo y aporta otras ideas sobre el dibujo y la pintura como los procedimientos, las partes de las formas y la materia. Pero en el libro tercero, referido a la práctica, trata otros temas que también interesaron a los pintores como las representaciones de las flores, las frutas y los paisajes. Estos son temas que para la época eran de entretenimiento y de goce, considerando importante tratarlos ya que opuestos a otros temas de mayor importancia, como el religioso o político “es entretenida la pintura de flores imitadas del natural en tiempo de primavera; y algunos han tenido eminencia en esta parte, particularmente en Flandes”. Temas como la primavera y las alegorías donde



está presente la flora, curiosidades como las guirnaldas, bellas cenefas de pared con flores y frutos entre roleos, y que están incorporados en las representaciones artísticas y gustaban mucho. Algo que merece atención en estas reflexiones es que el ejercicio de pintar flores y frutos tiene un grado de dificultad propio y que no todos los pintores lograron impactar y conmover pintando estos temas, que al parecer de muchos pintores no son menores y se deberían incorporar con más frecuencia en la enseñanza [17].

Se puede deducir, que no fue ajeno en este proceso que las formas y la organización de las figuras pudieran llegar de muchas fuentes afines a la profesión del pintor, por ejemplo, a través de las estampas, dibujos y los mismos objetos de uso, siendo ejemplos de cómo solucionar problemas de organización y construcción de patrones visuales.

Teniendo en cuenta las anteriores referencias se puede considerar que los españoles trajeron de España un saber y experiencia del oficio regido por ordenanzas y regulaciones que pusieron en práctica en el Nuevo Mundo. Este es un saber aprendido que se atesora en la memoria y en la habilidad práctica, ya que la mayoría de tratados en España son libros profesionales en los que se recoge un saber colectivo que se viene dando de tiempo atrás, en este caso el saber propio de los pintores. En él se realizan significativos aportes por parte del autor, que siempre es un maestro mayor del oficio, brindando, tanto datos técnicos como especulativos que servían de orientación en el ejercicio de la profesión [18]. Lo que se quiere decir es que el conocimiento del oficio existía en España antes de que se escribiera el tratado, y es en la gran mayoría de los casos el saber que se trae y se aplica en los nuevos territorios. El hecho de que en los tratados se incluyan temas asociados al ornamento con la representación de las flores, es relevante para esta reflexión dado que son fundamentales para estructurar la imagen en el arte de barniz de Pasto.

Así se entiende que los pintores que ejercieron en España, al llegar a América, practicaron, transmitieron y aplicaron los principios de su arte. Igualmente establecieron las prácticas de taller para aprender a dibujar utilizando las estampas, modelos y patrones, algunos libros del oficio y ciertos recursos como la regla, el compás y máquinas para hacer perspectivas<sup>9</sup>. No es extraño que pintores, ya fueran de pared, de escultura o de lienzo que se incorporaron tempranamente a los talleres de los pintores de barniz de Pasto, desarrollaran ciertas prácticas artísticas y habilidades que afectaron la producción en los siglos XVI, XVII y parte del XVIII pues al final de este siglo el trabajo artístico con el recurso del *mopa-mopa* se simplificó ya que se fue perdiendo el saber del buen dibujo, el control sobre la forma y la composición evidenciándose un trabajo más intuitivo que profesional. Es por esto que en 1777 bajo la administración del virrey Manuel Antonio Flores (1776-1782), llega a la Nueva Granada y a la ciudad de San Juan de Pasto la *Instrucción general para los gremios de todos los oficios*<sup>10</sup>, instrucción que, desde el estado español buscaba recuperar un buen nivel de formación en todos los campos de los oficios y así recuperar la calidad y fomentar la industria. Proponía establecer veedores que regularan la formación del artesano desde su estado de aprendizaje y planteaba las cátedras de aritmética, geometría y álgebra orientadas a las necesidades de cada actividad artística, ya que las obras no presentaban un buen nivel de ejecución pues eran muy básicas y elementales en su configuración y poco destacaba la composición, el equilibrio, el manejo de la simetría, el control de las superficies y la creación de centros y puntos de tensión<sup>11</sup>.

## 2. El barniz de Pasto, un arte recursivo en conexión con otros oficios artísticos

De otra parte hay que reconocer que el pintor de barniz no trabajaba integralmente una obra como arcos, escritorios, atriles y, entre otros los cofres. El recubrimiento de barniz de Pasto tenía que adaptarse al objeto soporte, a las superficies interiores y exteriores de una gran diversidad de estos elementos que en su gran mayoría eran hechos en madera. Escritorios con diversos diseños, bufetillos, cajas, costureros, cofres, vasos, bandejas, platos, ciriales, atriles y variedad de recipientes, totumos y calabazos. Estos objetos de madera con sus cerraduras, bisagras y demás accesorios, fueron elaborados por carpinteros, herreros y plateros, lo que indica que son componentes y materiales que proceden de diversos talleres y que relacionan a maestros de distintos campos profesionales.

Lo que quiere decir que para cubrir con *mopa-mopa*, por ejemplo, un escritorio, el pintor de barniz de Pasto tenía que llegar a acuerdos, según el caso, con el carpintero, el herrero o el platero.

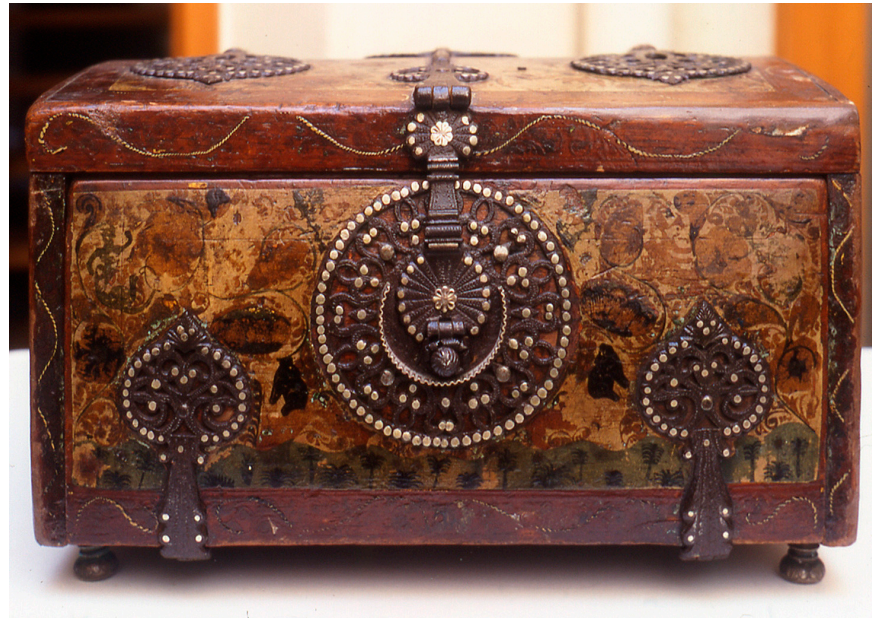

**Imagen 2.** Escritorio colección privada Coll & Cortés, Francisco Marcos. Madrid, España. Madera, hierro, plata y barniz de Pasto. Siglo XVII. Fotografía María del Pilar López Pérez. Se observa una adecuada integración entre el trabajo en barniz de Pasto y el trabajo de herrería.

Una vez elaborado el objeto en madera, y según las evidencias en las obras, el carpintero en acuerdo con el cliente podía no instalar los herrajes y pasar el escritorio al pintor de barniz de Pasto para su recubrimiento. En este caso, tuvo a su disposición las superficies para desarrollar su programa artístico, marcando con barniz las partes en donde irían los brazos de las bisagras, la cerradura y el brazo de la aldaba de cerradura (ver Imagen 2). A veces, tanto el carpintero como el herrero respetaron las indicaciones, pero en otros casos colocaron los herrajes donde ellos quisieron, afectando las superficies y el programa iconográfico del objeto, pues sentaban la cerradura sobre alguna figura importante y relevante de la composición. Pero al contrario, cuando el pintor de barniz recibía el objeto completo ya acabado, con todos los accesorios funcionando, procedía a cubrir las superficies que le dejaron disponibles, adaptando su diseño formal y compositivo a las condiciones del objeto ya acabado. El otro aspecto a tener en cuenta es la solicitud del cliente, quien muchas veces tenía nociones de dibujo y sentido artístico, adquiridas como parte de su formación. En las obras por encargo con requerimientos específicos, representados por el cliente por medio de ilustraciones gráficas o de otra naturaleza, el pintor de barniz tenía que saber interpretar el encargo y ubicar las imágenes adecuadamente en las superficies de los objetos<sup>12</sup>.

Como sucede con los distintos acabados de los objetos de uso ya sean en taracea, en cuero repujado, pintados, tallados o recubiertos en barniz de Pasto, todos comparten, en términos generales, figuras e iconografías.

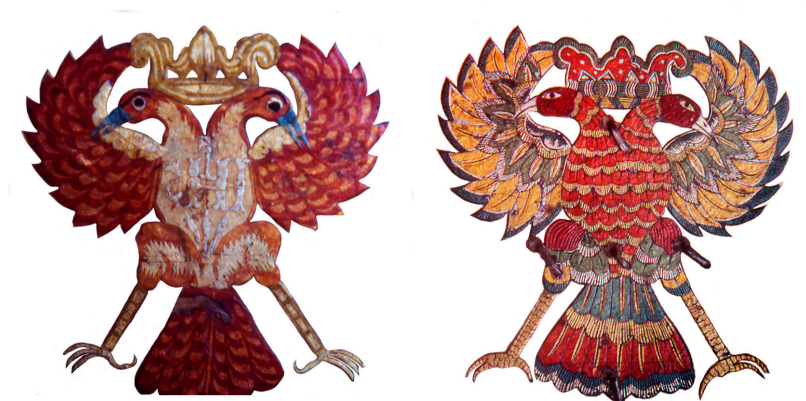

**Imagen 3.** Franja superior: águilas bicéfalas, de izquierda a derecha: imagen de un arca posiblemente jesuita, siglo XVII, colección privada Colombia. Imagen derecha escritorio de estrado, siglo XVIII, colección privada, Colombia.

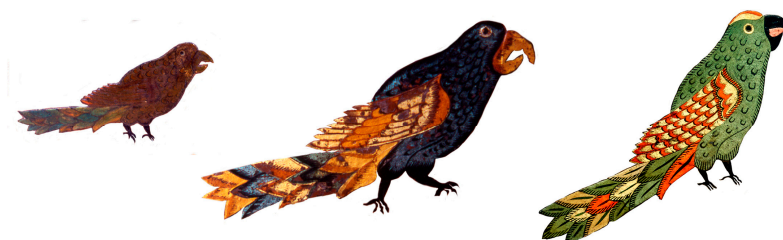

**Imagen 4.** Franja intermedia: loros, de izquierda a derecha: Loro de un cofre grande o arcón. Siglo XVII-XVIII, colección privada, Colombia. Loro de escritorio de los Agustinos Recoletos, finales del siglo XVII, colección privada, Colombia. Loro del escritorio que mandó hacer Cristóbal Bernardo de Quirós, en torno a 1663, colección, The Hispanic Society of America, Nueva York, código LS2000.

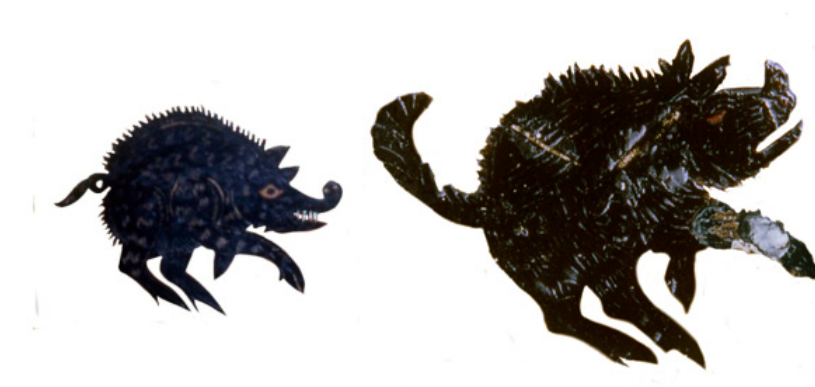

**Imagen 5.** Franja inferior: jabalíes, de izquierda a derecha: imagen de un arca posiblemente jesuita, siglo XVII, colección privada Colombia. Jabalí de la colección del Palacio de Nariño, código 01-02-04-03-11-001-004044, siglo XVII, Bogotá Colombia.

Junto a las posibilidades y limitaciones del recurso técnico de tener una membrana de color que se podía recortar, facilitó un modelo formal esquematizado que fue constante durante mucho tiempo, surgiendo modelos repetidos a partir de patrones físicos o producto del recuerdo. Así las mismas formas de animales, flores y ornamentos estuvieron presentes durante mucho tiempo. Como ejemplo desarrollaron algunos perros,

monos, loros, dragones, jabalíes y flores fantásticas, entre otros. La repetición de la imagen en uno o en otro objeto, con diferentes usos no afectaba los valores de la obra, siempre y cuando ésta respondiera correctamente a un encargo específico (ver Imágenes 3-9).

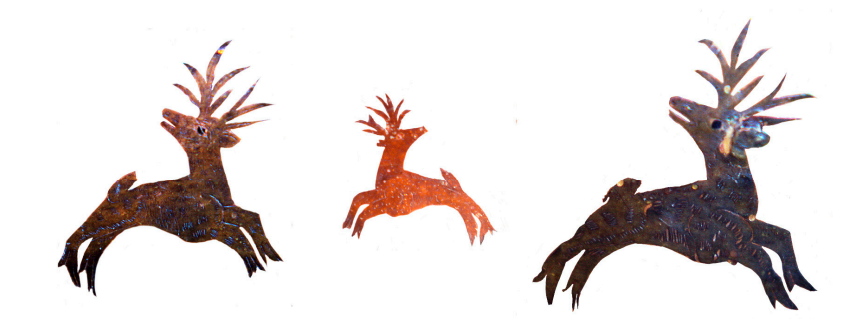

**Imagen 6.** Franja superior: ciervos, el de la izquierda y el de la derecha están ubicados en un arca, posiblemente jesuita, siglo XVII, colección privada Colombia. El ciervo en el centro forma parte de una caja con temas morales siglo XVII, colección privada, Colombia.

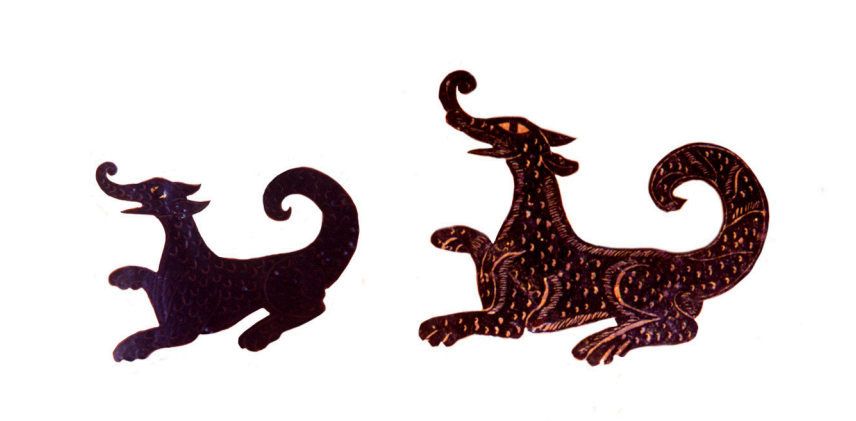

**Imagen 7.** Franja intermedia: dragones, el de la izquierda se encuentra en una bacia con disco central, siglo XVII, Museo de América, código 12242, Madrid. El dragón de la derecha se encuentra en el escritorio de los Agustinos Recoletos, siglo XVII, colección privada, Colombia.

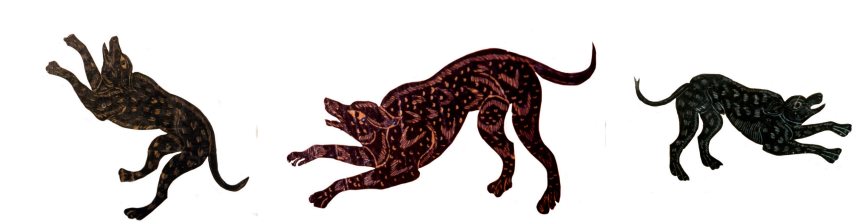

**Imagen 8.** Franja inferior: perros galgos, de izquierda a derecha, los dos primeros forman parte del escritorio de los Agustinos Recoletos, interior de la tapa frontal en postura hacia arriba y el segundo cara lateral posición normal, siglo XVII, colección privada, Colombia. El perro de la derecha forma parte de un escritorio con el tema del árbol de la vida y el pelícano, siglos XVI-XVII, Museo Nacional del Ecuador, Quito, código 0082-020-78.



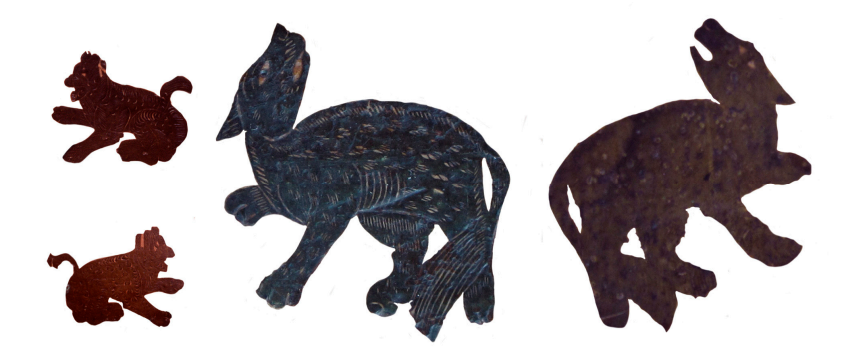

**Imagen 9.** Perros mirando hacia arriba, los dos pequeños de la izquierda pertenecen al escritorio con una escena de honor, un duelo, siglo XVIII, colección privada Coll & Cortés, Francisco Marcos. Madrid, España. La imagen del centro es parte del escritorio que tiene representado el árbol de la vida con el pelícano, siglos XVI-XVII, Museo Nacional del Ecuador, Quito, código 0082-020-78. El perro de la derecha forma parte del escritorio que tiene un gran escudo, del siglo XVIII, Museo Colonial, Quito, código CCE: 03-12-08-1132-1, INPC: 2M2-1286-82.

### 3. Estructura y organización de las superficies trabajadas con barniz de Pasto en los casos de una bacia, un arca y un escritorio

Partiendo de las maneras cómo el artista del barniz de Pasto asumió el control formal y organizativo de las superficies, y tomando algunas obras representativas de este contexto cultural, se reflexionará sobre algunas de las formas y estructuras de organización presentes o subyacentes en la composición como: trazas, ejes, retículas, marcos, simetrías, focos de ordenamiento, tratamiento de las superficies planas y curvas, límites, elementos geométricos y ornamentales, esquineras, y elementos relevantes como: discos, escudos, animales, flores, frutos, vegetación, pisos, figuras humanas, canastos y jarrones. El dominio del plano, el manejo de la línea, el trazo y el gesto libre, la selección de las figuras y la abstracción geométrica o morfológica de las mismas, el manejo de la simetría y el equilibrio, y la creación de tensiones y movimientos con los elementos compositivos pone en evidencia un conocimiento profesional en los campos del dibujo y la pintura, además de un nuevo saber sobre la técnica misma de este recubrimiento de origen vegetal.

Se escogieron tres objetos de diferentes épocas y usos como representativos de este estudio: una bacia, un arca y un escritorio y en todos se tomó la superficie de mayor relevancia.

En la colección del Museo de América de Madrid se encuentra una bacia del siglo XVII. Es un objeto con superficie curva cóncava, con un borde u orilla tallada en madera a manera de festón y dos entradas enfrentadas con forma de semicírculo. En su diseño se definen dos zonas con un marco de delicados roleos dispuesto sobre un fondo con color y las dos zonas de la cavidad se articulan por medio de un disco central (ver Imagen 10). Hacia cada una de las zonas, y articulados con este disco, aparecen dos dragones de cuyas bocas salen finos tallos, que se distribuyen a lado y lado, con una estructura semejante a la del roleo. La superficie recubierta por el barniz se trabajó de manera ingeniosa, pues a pesar de ser iguales las figuras de animales y flores de cada zona, los dos dragones se dispusieron en posición contraria, uno hacia abajo y el otro hacia arriba generando una tensión visual opuesta, un efecto de movimiento, como si el objeto girara en el sentido opuesto a las manecillas del reloj a través de un punto de giro central (ver Imagen 11).

Por otro lado, el color también es fundamental, pues se percibe un equilibrio dinámico, al aplicarse a sectores de follajes con cierta asimetría. Es importante destacar que el festón de borde responde a un diseño que utilizaron los artesanos de diferentes campos profesionales, por ejemplo los plateros como remate de borde de diferentes objetos, los encoradores como guardapolvo en las tapas de las petacas y los trabajadores del campo textil, configuraron con este tipo de festón el marco de los manteles, carpetas y mantillas. Todos comparten, en términos generales, figuras y programas iconográficos.



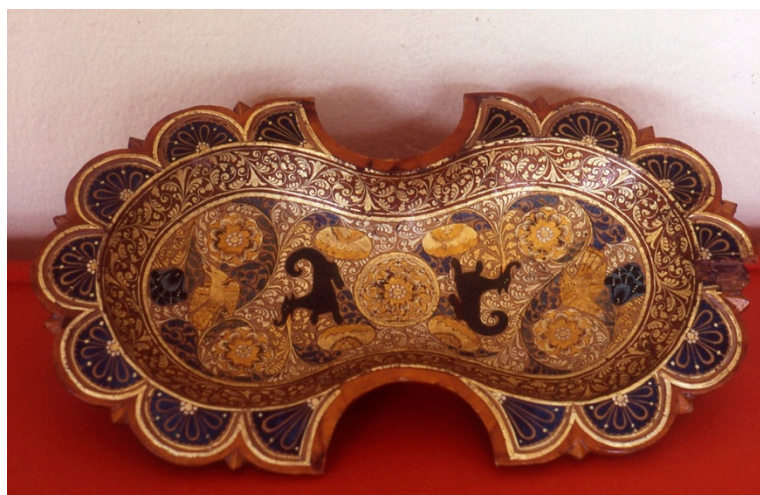

**Imagen 10.** Bacia con un disco central y dos dragones. Madera y barniz de Pasto. Siglo XVII. Museo de América Madrid, España, código 12242.

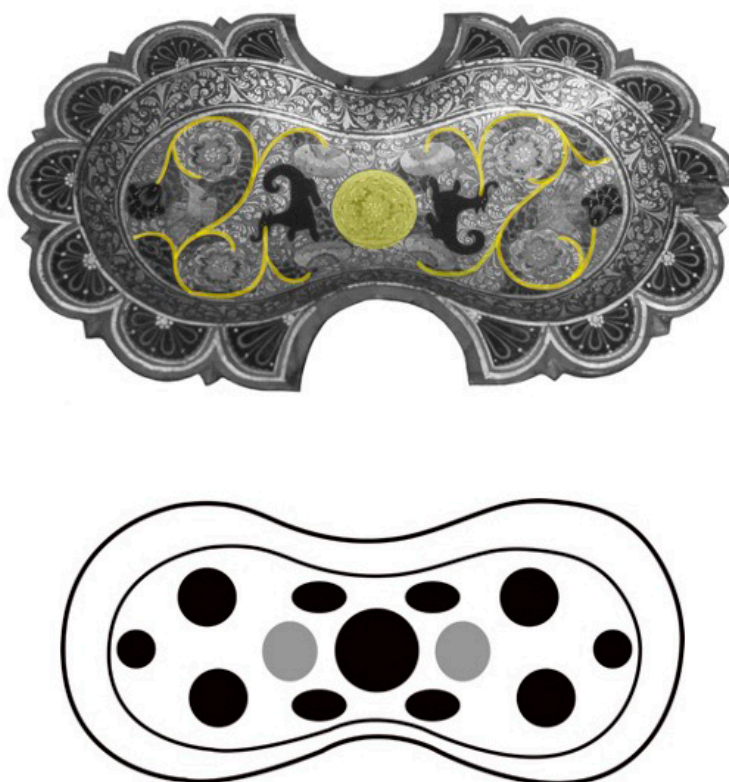

**Imagen 11.** Red subyacente y estructura organizativa de los elementos principales que son focos de atención visual. Elaboración María del Pilar López Pérez.

Otro objeto interesante es un arca de forma rectangular, posiblemente Jesuita, de comienzos del siglo XVII de una colección particular en Colombia, el recubrimiento que nos interesa es el interior de la tapa (ver Imagen 12). Como obra temprana del siglo XVII, la superficie fue trabajada sobre un fondo de color y delimitada con un marco de delicados

roleos, ubicando un querubín en medio de cada uno de los cuatro lados del marco, marcando puntos posibles de ejes de composición. Al interior, en las esquinas hay cuartos de círculo bellamente ornamentados en formas de escama, cerrando la superficie en su eje horizontal y reforzando el eje de simetría bilateral. El eje central es un árbol, y en su parte superior se asienta un águila bicéfala coronada con el monograma en su pecho, colocado en forma invertida. El resto de la superficie está totalmente cubierta con variados animales como ardillas, perros y aves, muchos de ellos repetidos, manejados como patrones y distribuidos de manera equilibrada con una simetría especular, entre dinámicos follajes y flores que se entrelazan, conformando curvas y contracurvas en una dinámica composición, bajo el rigor de la simetría que cubre la mayor parte de la superficie. El color es también distribuido creando focos de atención permitiendo la percepción individual de cada elemento pero marcando un sentido riguroso de la simetría bilateral (ver Imagen 13).

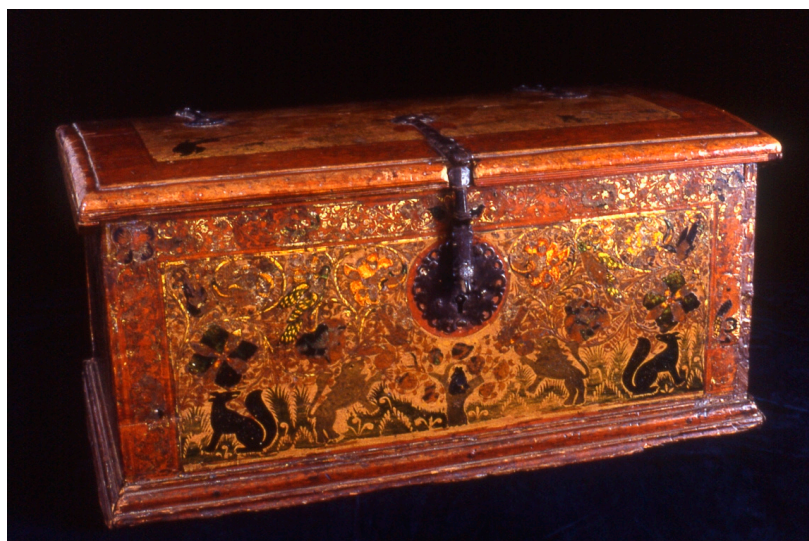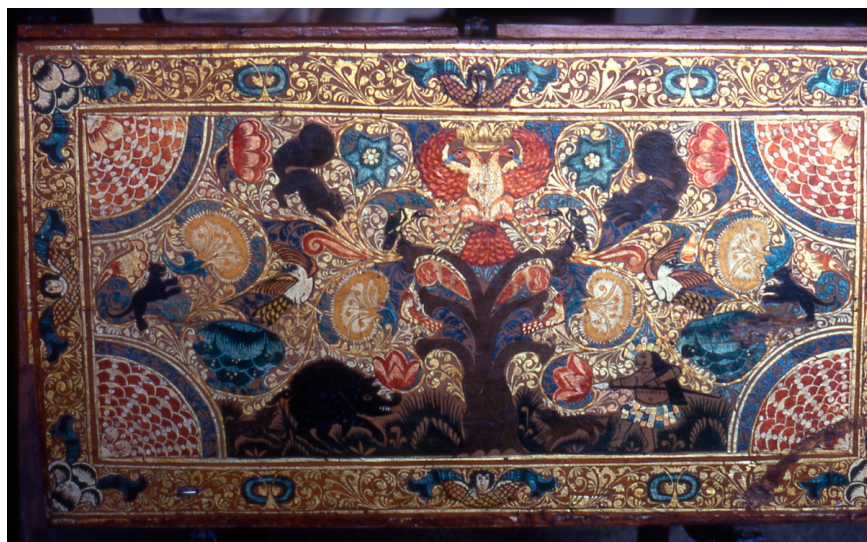

**Imagen 12.** Arriba: Arca posiblemente jesuita. Madera, hierro y barniz de Pasto. Siglo XVII. Colección privada, Bogotá, Colombia. Abajo: Interior de la tapa del arca. Fotografías de María del Pilar López Pérez.



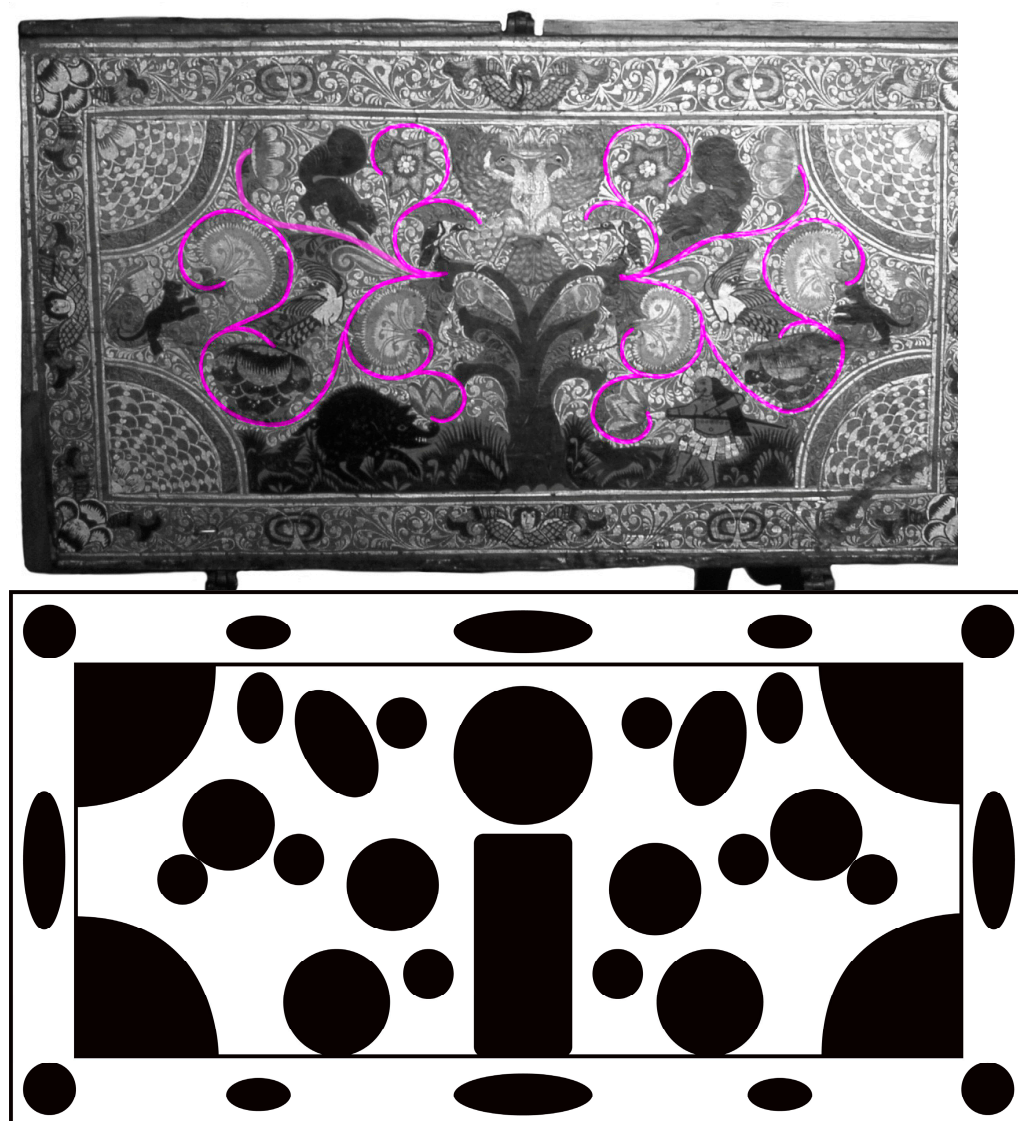

**Imagen 13.** Red subyacente y estructura organizativa de los elementos principales que son focos de atención visual. Elaboración María del Pilar López Pérez.

Finalmente está el escritorio, posiblemente de estrado del siglo XVIII, perteneciente a una colección particular en Colombia (ver Imagen 14). La superficie interior de la tapa superior tiene forma casi cuadrada y un fondo en color sin marco. Esta superficie está densamente cubierta en primer plano por ramilletes de flores de diversos tamaños y en distintas posiciones, algunos frutos y todo conectado por delgados tallos y salpicado por hojas sueltas en blanco y negro. No hay ninguna aparente red organizativa, no hay simetrías ni horizontes y carece de piso, pero claramente existe un sentido del orden y equilibrio. Resaltan en la composición dos elementos principales: los ramilletes de flores rojas y los delgados tallos que se desenvuelven en todas direcciones generando dinamismo (ver Imagen 15).

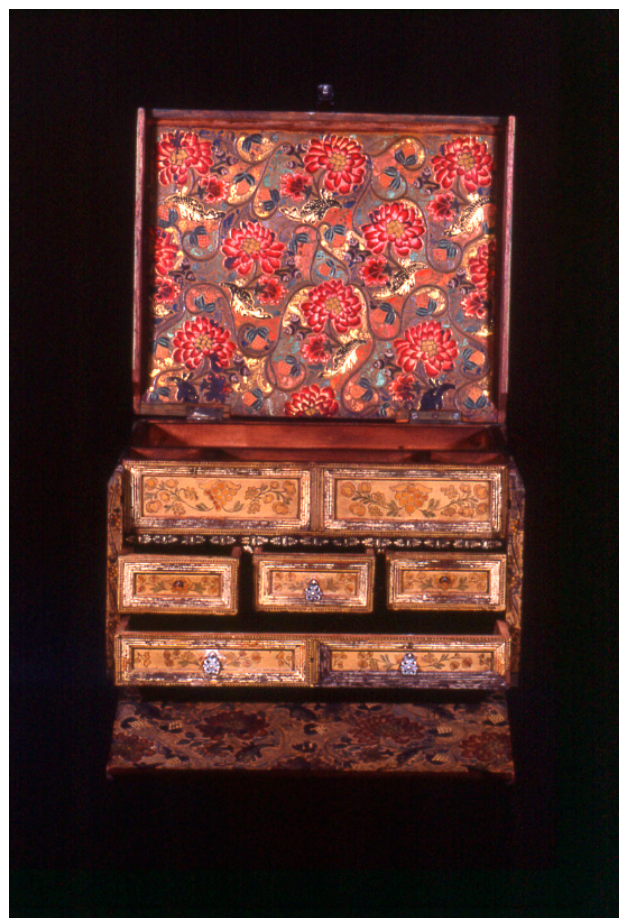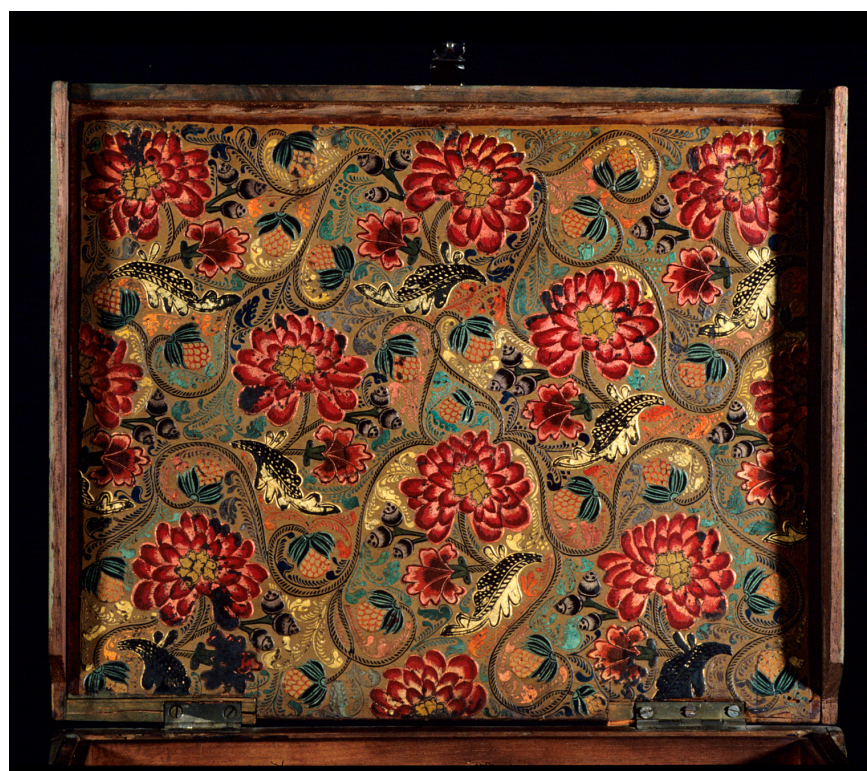

**Imagen 14.** Interior de la tapa superior de un escritorio de estrado. Madera, hierro y barniz de Pasto. Siglo XVIII. Colección privada Colombia.



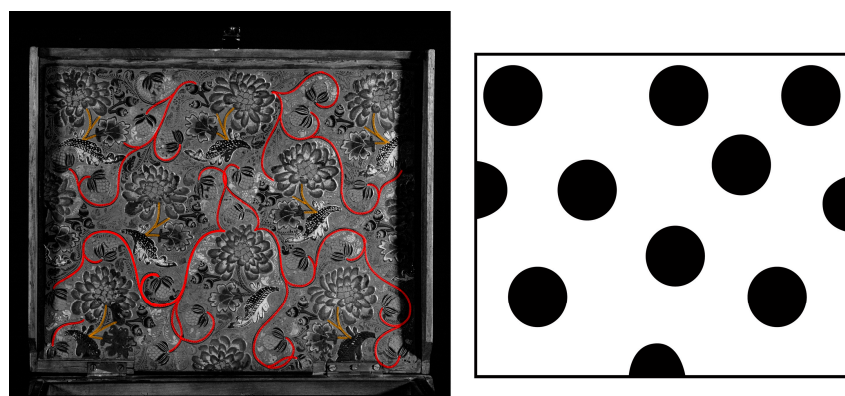

**Imagen 15.** Red subyacente y estructura organizativa de los elementos principales que corresponden a las flores y son los focos de atención visual. Elaboración María del Pilar López Pérez.

#### 4. Estructura y organización de las superficies trabajadas con barniz de Pasto en casos similares de otras prácticas artísticas

Existen otros ejemplos cuya apropiación de la superficie, su organización, distribución con sus equilibrios y tensiones no se incluyen en esta reflexión. Por ejemplo, la organización de los elementos por franjas siguiendo la linealidad de unos cajones, o la organización por primeros y segundos planos, cuando las formas están dispuestas sin fondo ni piso, o cuando el foco no corresponde a un centro sino a dos. Son algunas soluciones que dieron los pintores de barniz de Pasto, de acuerdo a su ingenio y a la modalidad de encargos de obras.

Se pueden realizar estudios de obras que formaron parte de otros campos artísticos y compararlas con obras en barniz de Pasto. Sobre el trabajo en plata se puede decir que la gran mayoría de las obras contaba con un dibujo, así fuera un boceto, pero también la gran mayoría de dibujos se perdieron. Así como sucedía con los pintores, los plateros también recurrieron a diseños que surgían en el seno de otras profesiones, como los tejidos de los ornamentos y la arquitectura, incluyendo la pintura mural. Su profundo conocimiento de la geometría y las proporciones les permitieron desarrollar claras composiciones, distribuciones equilibradas con refinados elementos formales.

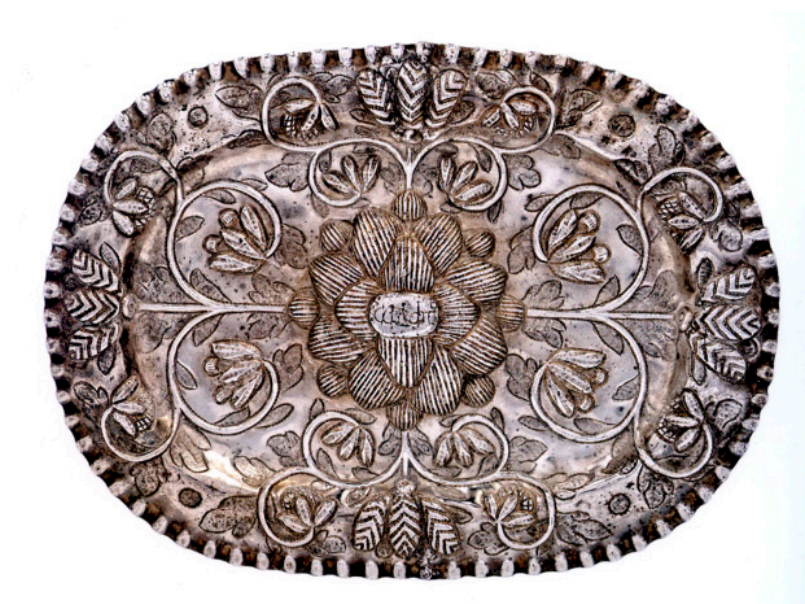

**Imagen 16.** Bandeja de plata. Siglo XVII. Colección Catedral de Bogotá. Colombia, código 05.1.137. Distribución organizativa, evidente control de la superficie, ejes de composición vertical y horizontal, sentido de centro perceptivo estático en el asiento, simetría bilateral o especular.



La bandeja de forma alargada (ver Imagen 16), elaborada en plata martillada, repujada y cincelada, del siglo XVII, forma parte de las colecciones de la Catedral de Bogotá. Como dice Jesús Paniagua Pérez, su superficie corresponde a una estructura y un modelo ornamental que se utilizó con frecuencia en esa época, no sólo en el caso de la plata, también en estructuras semejantes las podemos observar en las obras de barniz de Pasto. La superficie de la bandeja se enmarca con una ancha cenefa en toda la orilla alrededor y se encuentra organizada por un florón central de donde brotan simétricamente cuatro grandes ramos de flores cuyos tallos delgados se curvan definiendo el espacio para ubicar una flor en punta. Es como si del florón central saliera una cruz de tallos rectos y curvados con flores que cubren la totalidad de la superficie [19]. Es una obra en la que vemos recursos similares a los utilizados por los pintores de barniz, en cuanto a orden y estructura. Por ejemplo, la superficie interior de la tapa del arca con el emblema de la comunidad Jesuita, trabajada en barniz de Pasto, también corre en todo su contorno una cenefa de refinados roleos formando un marco. Se observa claramente definido un eje de simetría bilateral y para entretejer todos los elementos, en este caso las imágenes de animales y pájaros, se diseñó un ramaje a cada lado, de finos tallos de flores y hojas formando curvas y contracurvas, semejante al trabajo de la bandeja en plata (ver Imágenes 12 y 13).

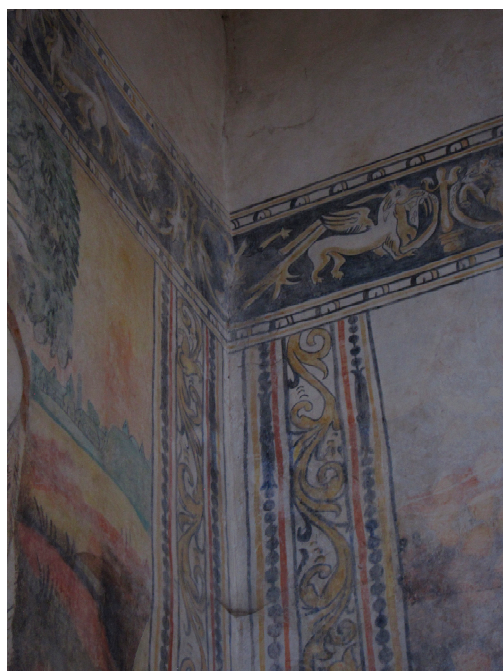

**Imagen 17.** Iglesia de Tumerqué (Siglos XVI – XVII), Boyacá, Colombia. Cenefa con roleos en pintura mural.

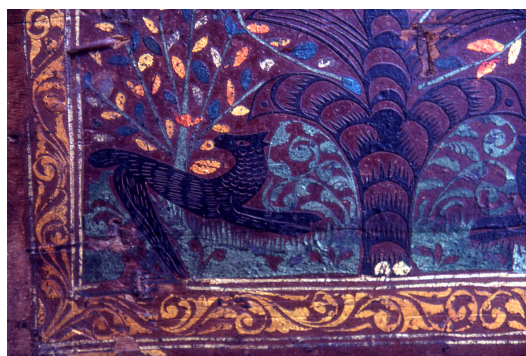

**Imagen 18.** Escritorio, Colección privada, Pasto, Nariño, Colombia. Interior de la tapa superior. Cenefa de marco con roleos en *mopa-mopa*.

Igualmente los marcos que definen y delimitan las superficies, comparten en sus diseños formas y proporciones entre diferentes artes y son determinantes a la hora de estructurar los planos y los volúmenes. Por ejemplo, la forma seleccionada para una cenefa de pared vista en la iglesia de Turmequé, Colombia (ver Imagen 17), es muy similar a la encontrada en el marco de la superficie de un escritorio de barniz de Pasto (ver Imagen 18). Son obras donde está implicado el dibujo cuya fuente más importante estaría asociada a la actividad de la pintura. Valdría preguntarse si en los primeros talleres de pintores de barniz se dibujó, se realizaron bocetos o ¿cómo desarrollaron esos modelos tan perfectos y proporcionados ubicados en las cenefas? ¿qué sistemas de representación visual utilizaron? pues aparentemente el trabajo no requirió de dibujos, plantillas o modelos, es puramente mnemotécnico.

## 5. Consideraciones finales

Este arte tiene como antecedente el maravilloso trabajo realizado por los indígenas asentados en el sur de Colombia y en el norte del Ecuador quienes descubrieron y aprovecharon la sustancia pegajosa que brotaba de la planta, hoy reconocida como *Elaeágias Pastoensis*, desarrollando variadas posibilidades de aplicación y uso.

Como ya se ha tratado por diversos historiadores del arte en el caso de los enconchados [4] y en el arte plumario mexicano<sup>13</sup>, expresiones artísticas cuyas materias y algo de los aspectos técnicos son originarias de América; y su desarrollo a partir de la presencia española en el continente está conectado con el arte de la pintura. Parece que en el arte del barniz de Pasto sucedió algo semejante. Las obras más antiguas realizadas por superposición de capas de membrana con presencia de lámina de plata, fueron solicitadas por personas pudientes provenientes de diversos sectores de la sociedad, que reconocían en los trabajos de los pintores de barniz de Pasto obras calidad a través de la variedad de soluciones artísticas que brindaba el dominio del dibujo y manejo del color, lo que indicaría esa interdependencia con el arte de la pintura.

Las obras producidas con recubrimiento de barniz de Pasto en el Nuevo Reino de Granada, no solamente son resultado de un trabajo de acumulación de prácticas y experiencias, pues en ellas se puede reconocer un saber profesional que implicó tener una formación regulada a través de unos referentes locales y otros traídos de España con los que se produjo una obra controlada por los intereses del grupo de artesanos [20].

En la primera parte, busqué una explicación sobre ese saber hacer profesional que les permitió resolver tan adecuadamente y con tanto sentido artístico los objetos recubiertos con barniz de Pasto, e indagué sobre el campo profesional *del pintor*, que trabajó en los diseños que se aplicaron a los objetos de las artes industriales, específicamente el diverso campo del ornamento, reconociendo la importancia de la práctica del dibujo, así como las nociones de simetría, orden y proporción. Los textos profesionales como los tratados de pintura y manuales de dibujo, así como las fuentes de estampas y la diversidad de elementos artísticos a través del ornamento en objetos como los textiles e ilustraciones [21], evidencian unas interesantes conexiones en el campo de la composición y manejo de figuras entre la pintura de pared y de escultura y el barniz de Pasto, no visto desde su técnica sino desde su armonía, equilibrio o desde la centralidad dinámica de las formas.

En la construcción de la estructura de la imagen como se evidencia en las obras arriba tratadas existió y aún existe memoria y herencia de un trabajo que se desarrolló con control, recursos técnicos y conocimiento artístico. Son obras donde está implicado el dibujo del ornamento que como se sabe tiene esa condición de intercambiabilidad, que pertenece a varios oficios y además es atemporal y estaría asociado a la buena formación del artífice.

**Materiales complementarios:** La versión en inglés de este artículo puede descargarse de: <https://www.mdpi.com/article/10.3390/heritage6070000/s1>.

**Financiación:** Esta investigación no ha recibido financiación externa.

**Agradecimientos:** Nuestro sincero agradecimiento a Natasha Vargas (traductora), Robert Esposito y Laura Ramirez Polo (revisores) de la Rutgers University para la versión de este artículo en inglés.

**Conflictos de intereses:** La autora declara no tener ningún conflicto de intereses.

## Notas

- <sup>1</sup> Esto se puede afirmar si se tiene en cuenta los relatos de viajeros extranjeros, noticias de las expediciones científicas y las ilustraciones de los talleres de artesanos de mediados del siglo XIX.
- <sup>2</sup> AGN. Archivo General de la Nación, Bogotá Colombia. Sección Colonia. Notaría 3. Tomo 37. 1633, ff. 66, and AGN. Archivo General de la Nación, Bogotá Colombia. Sección Colonia. Notaría 3. Tomo 53. 1639. ff. 65.
- <sup>3</sup> AGN. Archivo General de la Nación, Bogotá Colombia. Sección Colonia. Notaría 3. Tomo 53. 1639, ff. 65-66.
- <sup>4</sup> Un buen estudio que abarca los inicios de la formación del pintor: desarrollo profesional y valores personales es el realizado por María A. Vizcaino Villanueva. Ver Ref 10.
- <sup>5</sup> Además los maestros en sus talleres enseñaron utilizando algunos implementos que formaron parte de la formación del pintor, independiente de la paleta y el caballete, como fue la regla y el compás, los lápices o elementos para marcar, los cuchillos y otros útiles del oficio.
- <sup>6</sup> Los pintores recibían unas nociones de matemáticas y un conocimiento más completo de geometría, según lo manifiestan los tratadistas españoles. Pero como es conocido no todos se destacaron por igual en la expresión del dibujo, en la habilidad para aplicar conocimientos de geometría y menos en matemáticas pues la gran mayoría sólo sabía contar.
- <sup>7</sup> Jefe del Departamento de Conservación de dibujos y estampas del Museo del Prado, y ha sido comisario de varias exposiciones.
- <sup>8</sup> Un ejemplo claramente analizado es el diseño de tramas geométricas realizadas para las armaduras de carpintería de lo blanco de finales del siglo XVI y comienzos del siglo XVII. Diferentes propuestas formales se realizaron en Colombia como la techumbre de la Iglesia Mayor de Tunja 1567, la techumbre de la tercera Catedral de Bogotá 1584, techumbre de la iglesia de la Concepción en Bogotá 1586 – 1617, techumbre de la iglesia de San Francisco en Tunja 1595 y la techumbre de la Iglesia de San Francisco en Bogotá hacia 1590 – 1611, entre otras. Todas se construyeron antes de ser publicado el primer tratado de carpintería de lo blanco, el de Diego López de Arenas en 1633. Al comparar las obras ya realizadas con el tratado, coinciden en todo lo sugerido en las fórmulas de proporción y cálculos matemáticos con los que se realizaron la variedad de diseños. Lo que quiere decir que los artesanos trajeron el conocimiento y lo aplicaron sin haber sido escrito el tratado. Esto es aplicable a muchas prácticas artísticas. Ver Ref 14.
- <sup>9</sup> A.H.P. Archivo Histórico de Pasto. Pasto, Colombia. Sección Colombia. Cabildo. Caja 6. Tomo 2. ff 6r – 26v.
- <sup>10</sup> Documento de 1778, emitido por la Corona Española dirigido a las autoridades de la ciudad de San Juan de Pasto para mejorar y fomentar la industria. Archivo Histórico de Pasto, Instrucción general para los gremios de todos los oficios, Fondo Cabildo, caja 6, tomo 2, ff. 6r.-26v. Igualmente la misma orientación se encuentra en la “Instrucción general para los gremios de Santafé 1777”, cuya transcripción la realizó la historiadora del arte Marta Fajardo en: Revista Ensayos, nº 1, 1995, p. 189. Instituto de Investigaciones Estéticas, Universidad Nacional de Colombia. Bogotá, Colombia.
- <sup>11</sup> Es conocido que en el taller del pintor, grabador y dibujante Juan Cotrina Valero tenía como parte de sus implementos de trabajo una máquina de hacer perspectiva y el pintor Baltasar de Vargas Figueroa quien poseía una vastísima colección de estampas.
- <sup>12</sup> No existen contratos que nos aclaren cómo se encargaban las obras, sin embargo teniendo en cuenta los encargos en otras artes, algunas demandas por incumplimiento y otros documentos, se puede deducir una forma de proceder en el proceso de encargar las obras a los artesanos del barniz.
- <sup>13</sup> Ver, entre otras, las investigaciones de la historiadora del arte María Concepción García Sáiz al arte plumario en México.

## Referencias

1. Derrick, Michele; Kaplan, Emily y Newman, Richard. *Mopa-mopa: una extraordinaria resina aglutinante andina*. En: *Materia Americana. Cuerpos americanos, tradiciones e identidades, siglos XVI al XIX*. Gabriela Siracusano y Agustina Rodríguez Romero, editoras. EDUNTREF. Buenos Aires, Argentina. 2022, ps. 71-89.
2. Kawamura, Yayoi. *Laca namban. Brillo de Japón en Navarra*. En: *Historia del proyecto expositivo laca namban. Brillo de Japón en Navarra*. Fondo de Publicaciones del Gobierno de Navarra. Pamplona, España. 2015 – 2016, p. 33. ISBN 978-84-235-3408-1 <https://publicaciones.navarra.es> (consultado el 15 de febrero de 2018).
3. Palomino, Antonio. *El museo pictórico y escala óptica*. Aguilar Maior. 1988 (primera edición 1715). Madrid, España.
4. Ocaña Ruiz, Sonia. *Enconchados: gustos, estrategias y precios en la Nueva España*. En: *Anales del Instituto de Investigaciones Estéticas*. Vol. XXXVII, nº 106. Mayo 15 de 2015. UNAM, Ciudad de México, México. pp 75-77. <https://doi.org/10.22201/iiie.18703062e.2015.106> (consultado el 3 de diciembre de 2020).

5. Poma de Ayala, Felipe Guamán. *Nueva Crónica y Buen Gobierno*. Biblioteca Ayacucho. 1980 (manuscrito de 1615), p. 134.
6. Vargas, Laura. Del pincel al papel: fuentes para el estudio de la pintura en el Nuevo Reino de Granada (1552 – 1813). Instituto Colombiano de Antropología e Historia. 2012, p. 277-296.
7. Granda, Osvaldo. *Aproximación al barniz de Pasto*. 2007. Universidad de Nariño. 2007, p. 37.
8. Vizcaíno Villanueva, María A. *El pintor en la sociedad madrileña durante el reinado de Felipe IV*. Fundación Universitaria Española. Madrid, España. 2005, p. 166.
9. Navarrete Prieto, Benito. *La pintura andaluza del siglo XVII y sus fuentes grabadas*. Caylus. Madrid. 1998. ps. 25 – 31.
10. De Cavi, Sabina. Dibujar las artes aplicadas: dibujo técnico y de ornamentación en los talleres del Mediterráneo Ibérico en la era pre-industrial (siglos XVI-XIX). En: *Dibujo y Ornamento, trazas y dibujos de artes decorativas entre Portugal, España, Italia, Malta y Grecia*. Diputación de Córdoba, Ministerio de Economía y Competitividad, Universidad de Córdoba. 2013. ps. XXI-LXXVII.
11. Cuenca, María Luisa; Hernández Pugh, Ana y Mantilla, José Manuel. *El maestro de papel. Cartillas para aprender a dibujar, de los siglos XVII al XIX*. Museo Nacional del Prado, Centro de Estudios Europa Hispánica. Madrid, España. 2019.
12. Mantilla, José Manuel. *El maestro de papel. De cómo los jóvenes aprendieron a dibujar en la Edad Moderna copiando las líneas trazadas en una cartilla y algunas ideas más*. En: *El maestro de papel. Cartillas para aprender a dibujar, de los siglos XVII al XIX*. Museo Nacional del Prado, Centro de Estudios Europa Hispánica. Madrid. 2019, p. 12.
13. Salcedo, Jaime. *Mudéjar en Colombia y Venezuela. Arquitectura y urbanismo*. En: *Arte Mudéjar*. Borrás Gualis (Coordinador) Ediciones UNESCO. Zaragoza, España. 1995. p. 187.
14. Bordes, Juan. *Ojo, cerebro, mano. Historia de las cartillas de dibujo a través de su clasificación y estrategias docentes*. En: *El maestro de papel. Cartillas para aprender a dibujar, de los siglos XVII al XIX*. Museo Nacional del Prado, Centro de Estudios Europa Hispánica. Madrid. 2019, pp. 29-51.
15. Carducho, Vicente. *Diálogos de la Pintura*. Edición facsímil, dirigida por D. G. Cruzada Villaamil. Imprenta de Manuel Galiano. Madrid, España. 1865, p. 182.
16. Jusepe Martínez. *Discursos practicables del nobilísimo arte de la pintura*. Madrid, España. AKAL. 1988, pp. 67-73.
17. Pacheco, Francisco. *El arte de la pintura*. Cátedra. Madrid, España. 1990, pp. 509-512.
18. Bonet Correa, Antonio. *Figuras, modelos e imágenes en los tratadistas españoles*. Alianza Forma. Madrid, España. 1993.
19. Paniagua Pérez, Jesús. *Las bandejas*. En: *el arte de la platería en las colecciones de la Catedral de Bogotá (siglos XVI al XX). Bicentenario de la Consagración de la cuarta Catedral de Bogotá*. Arquidiócesis de Bogotá. Bogotá, Colombia. 2022, p. 44.
20. Bargellini, Clara y Díaz Cayeros, Patricia (Editoras). *El renacimiento italiano desde América Latina*. Instituto de Investigaciones Estéticas – Universidad Nacional Autónoma de México. Ciudad de México, México. 2018. ps. 11 – 25.
21. Peck, Amelia (Edited). *Interwoven Globe, The worldwide textile trade, 1500 – 1800*. The Metropolitan Museum of Art. New York. 2013. / Franch Benavent, Ricardo (coordinador académico de la publicación). *La participación valenciana en la ruta de la seda. Historia, paisaje y patrimonio*. Universitat de València. Valencia. 2021.

**Disclaimer/Publisher's Note:** The statements, opinions and data contained in all publications are solely those of the individual author(s) and contributor(s) and not of MDPI and/or the editor(s). MDPI and/or the editor(s) disclaim responsibility for any injury to people or property resulting from any ideas, methods, instructions or products referred to in the content.
